# Supplementary material for: Adsorption of tetracycline to nano-NiO: the effect of co-existing Cu(ii) ions and environmental implications
Source: Royal Society of Chemistry journal article supplement (doi:10.1039/c4em00096j), 2014-01-01
Supplement: c4em00096j1.pdf [file c4em00096j1.pdf]

## Supplementary Data

### **Adsorption of Tetracycline to Nano-NiO: Effect of Co-existing Cu(II) Ion and Environmental Implications**

Lin Duan, Lingfang Li, Zhu Xu, Wei Chen\*

College of Environmental Science and Engineering, Ministry of Education Key  
Laboratory of Pollution Processes and Environmental Criteria, Tianjin Key Laboratory of  
Environmental Remediation and Pollution Control, Nankai University, Tianjin, China

\* Corresponding author: Tel (Fax): +86 22-66229516; E-mail address:

[chenwei@nankai.edu.cn](mailto:chenwei@nankai.edu.cn)

*Adsorption kinetics experiments*

Batch experiments were conducted to examine the adsorption kinetics of tetracycline to nano-NiO or bulk-NiO. First, 100 mg of nano-NiO or bulk NiO was transferred to a 250-mL glass vial, followed by a full volume of tetracycline aqueous solution and then covered with aluminum foil to prevent exposure to light. The initial spiked concentration of tetracycline was 0.11 mmol/L. The vial was repeatedly sampled (<0.5 ml aliquot each time) at a predetermined time intervals (0 h, 0.5 h, 1 h, 4 h, 8 h, 16 h, 24 h, 36 h, 48 h, 60 h, 72 h, 84h, 96 h) to determine the aqueous phase concentration of tetracycline. Control experiments were conducted using vials receiving the same treatment as the adsorption samples but without nano-NiO or bulk-NiO.

**Table S1.** Surface area, pore volume and average pore size distribution of nano-NiO and bulk NiO.

|                     |                                                         | nano-NiO                 | bulk-NiO                 |
|---------------------|---------------------------------------------------------|--------------------------|--------------------------|
| <b>Surface Area</b> | BET Surface Area                                        | 52.70 m <sup>2</sup> /g  | 5.82 m <sup>2</sup> /g   |
| <b>Pore Volume</b>  | Single point adsorption total pore volume of pores      |                          |                          |
|                     | less than 160.1 Å diameter at P/P <sub>0</sub> = 0.987: | 0.153 cm <sup>3</sup> /g | 0.011 cm <sup>3</sup> /g |
|                     | BJH adsorption cumulative volume of pores               |                          |                          |
|                     | between 17.000 Å and 3000.000 Å diameter:               | 0.168 cm <sup>3</sup> /g | 0.022 cm <sup>3</sup> /g |
|                     | BJH desorption cumulative volume of pores               |                          |                          |
|                     | between 17.000 Å and 3000.000 Å diameter:               | 0.168 cm <sup>3</sup> /g | 0.021 cm <sup>3</sup> /g |
|                     | HK maximum pore volume at P/P <sub>0</sub> = 0.01:      | 0.013 cm <sup>3</sup> /g | 0.001 cm <sup>3</sup> /g |
| <b>Pore Size</b>    | Adsorption average pore width (4V/A by BET):            | 11.66 nm                 | 7.52 nm                  |
|                     | BJH adsorption average pore diameter (4V/A):            | 10.68 nm                 | 19.80 nm                 |
|                     | BJH desorption average pore diameter (4V/A):            | 9.69 nm                  | 17.92 nm                 |
|                     | HK median pore width:                                   | 0.64 nm                  | 0.81 nm                  |

**Table S2.** Freundlich model parameters for adsorption of tetracycline to nano-NiO and bulk-NiO.

|                             | $K_F$ (mmol <sup>1-n</sup> L <sup>n</sup> kg <sup>-1</sup> ) | n             | $R^2$  | $K_d$ (L/kg)                         |
|-----------------------------|--------------------------------------------------------------|---------------|--------|--------------------------------------|
| nano-NiO                    | 370 ± 20                                                     | 0.550 ± 0.015 | 0.9971 | 10 <sup>3.1</sup> -10 <sup>4.2</sup> |
| nano-NiO + Cu <sup>2+</sup> | 210 ± 20                                                     | 0.059 ± 0.027 | 0.6543 | 10 <sup>3.0</sup> -10 <sup>5.5</sup> |
| bulk-NiO                    | 90 ± 10                                                      | 0.421 ± 0.026 | 0.9849 | 10 <sup>2.6</sup> -10 <sup>3.9</sup> |
| bulk-NiO + Cu <sup>2+</sup> | 240 ± 10                                                     | 0.040 ± 0.008 | 0.8423 | 10 <sup>3.1</sup> -10 <sup>5.3</sup> |

**Table S3.** Adsorption distribution coefficient ( $K_d$ ) of tetracycline to selected natural geosorbents and carbonaceous materials, corresponding to an equilibrium aqueous phase concentration ( $C_w$ ) of 0.01 mmol/L.

| Adsorbent/conditions           | $K_d$ (L/kg)                                           | Reference     |
|--------------------------------|--------------------------------------------------------|---------------|
| montmorillonite                | $2.97 \times 10^3$                                     | [17]          |
| soil humic acid                | $1.32 \times 10^3$                                     | [23]          |
| coal humic acid                | $2.11 \times 10^3$                                     | [23]          |
| soil                           | $7.42 \times 10^2, 9.50 \times 10^2, 1.34 \times 10^2$ | [30,34]       |
| sediment                       | $1.53 \times 10^3, 1.18 \times 10^3, 7.30 \times 10^2$ | [30,36]       |
| clays                          | $7.40 \times 10^1, 1.71 \times 10^2$                   | [36]          |
| aluminum hydrous oxides        | $2.67 \times 10^2$                                     | [28]          |
| iron hydrous oxides            | $3.32 \times 10^2$                                     | [28]          |
| SWNTs                          | $5.45 \times 10^4$                                     | [18]          |
| MWNTs                          | $1.08 \times 10^4$                                     | [18]          |
| graphite                       | $8.61 \times 10^2$                                     | [18]          |
| nano-NiO                       | $2.94 \times 10^3$                                     | present study |
| bulk-NiO                       | $1.31 \times 10^3$                                     | present study |
| montmorillonite/0.25 mM Cu(II) | $1.18 \times 10^4$                                     | [17]          |
| SWNTs/ 0.12 mM Cu(II)          | $6.03 \times 10^4$                                     | [18]          |
| MWNTs/0.12 mM Cu(II)           | $1.94 \times 10^4$                                     | [18]          |
| graphite/0.12 mM Cu(II)        | $1.00 \times 10^3$                                     | [18]          |
| nano-NiO/ 0.10 mM Cu(II)       | $1.60 \times 10^4$                                     | present study |
| bulk-NiO/ 0.10 mM Cu(II)       | $1.99 \times 10^4$                                     | present study |

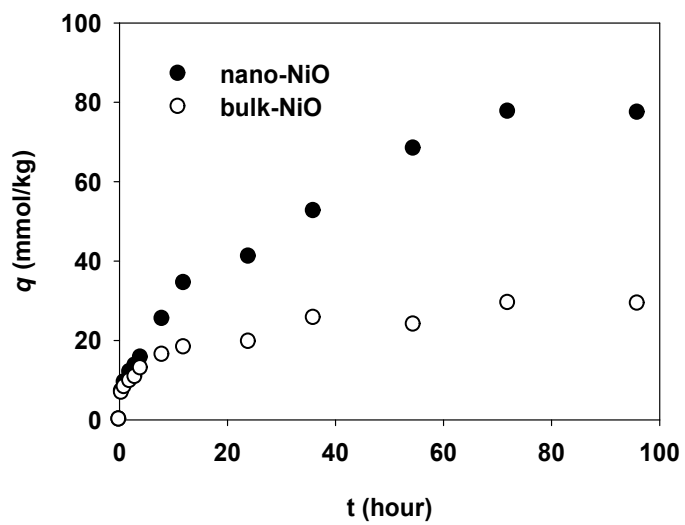

**Fig. S1.** Adsorption kinetic of tetracycline to nano-NiO and bulk-NiO under neutral pH, the initial spiked concentration of tetracycline was 0.11 mmol/L.

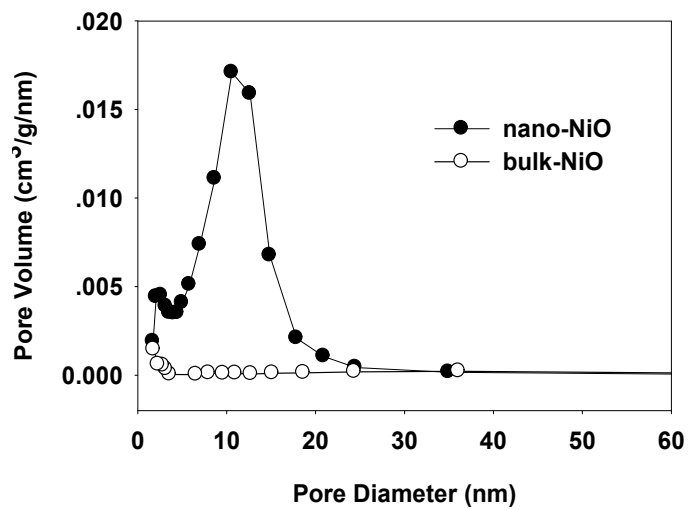

**Fig. S2.** Pore size distributions of nano-NiO and bulk-NiO measured by N<sub>2</sub> desorption.

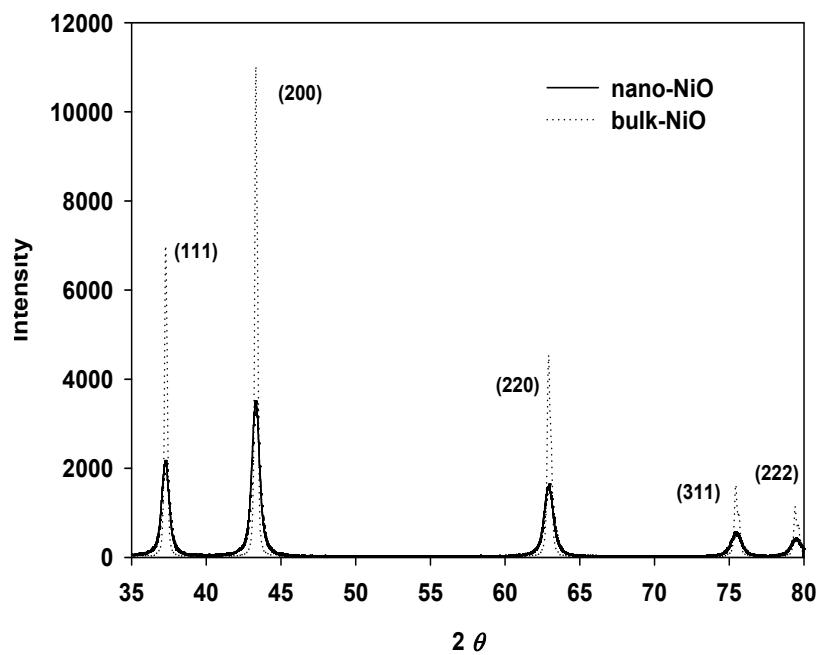

Fig. S3. X-ray diffraction data of nano-NiO and bulk NiO.



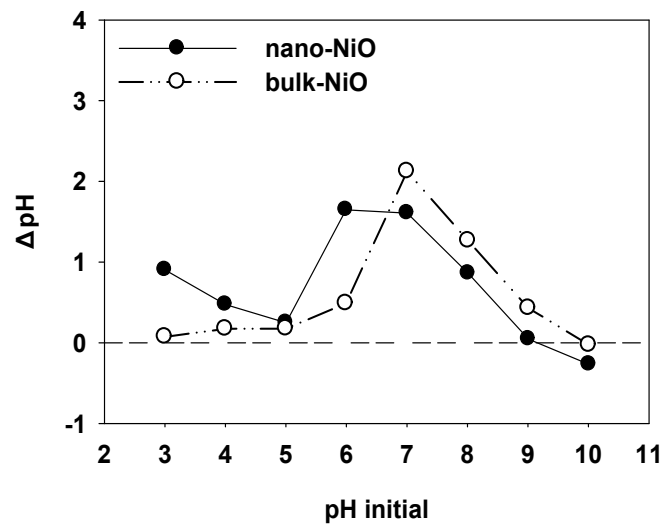

**Fig. S4.**  $\Delta\text{pH}$  versus initial pH of nano-NiO and bulk-NiO suspensions.

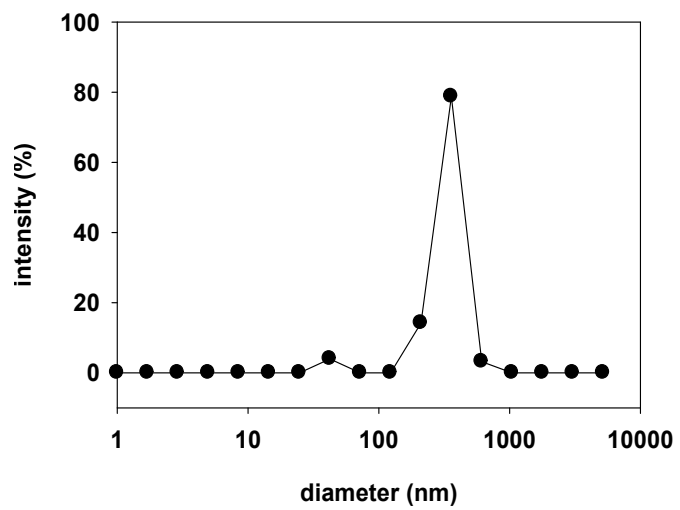

**Fig. S5.** Intensity-weighted particle size distribution of nano-NiO.

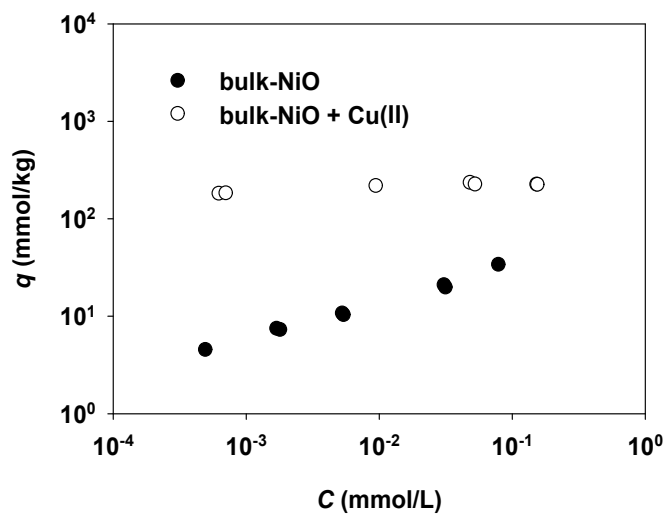

**Fig. S6.** Adsorption isotherms of tetracycline to bulk-NiO in the absence and presence of Cu(II) (initially at 0.1 mM).

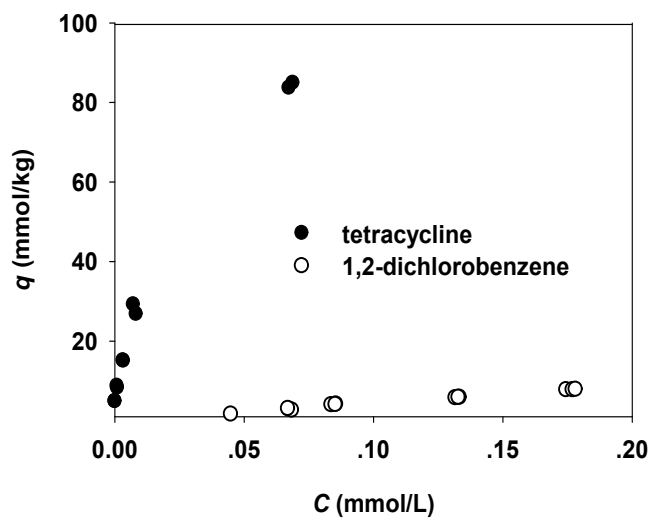

**Fig. S7.** Comparison of adsorption isotherms of tetracycline and 1,2-dichlorobenzene onto nano-NiO plotted as solid-phase concentration ( $q$ ) versus aqueous-phase concentration ( $C$ ).

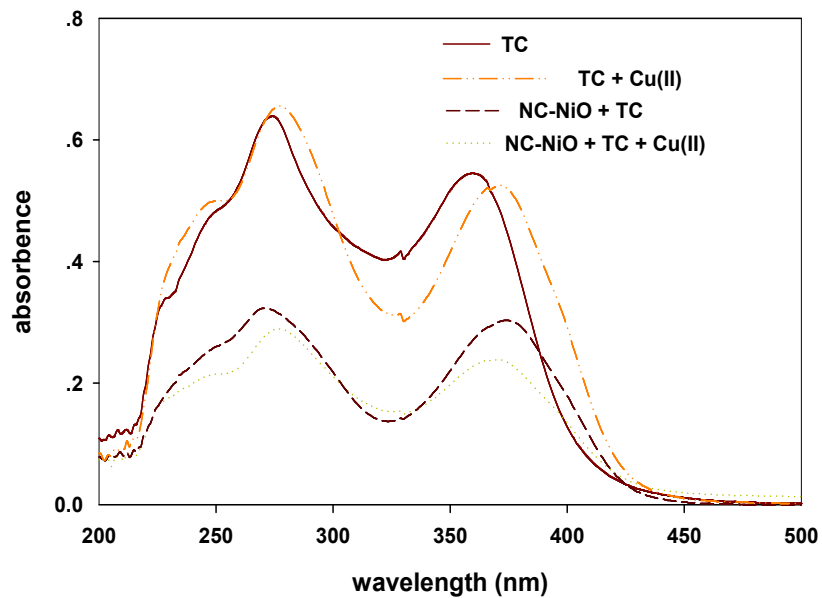

**Fig. S8.** UV spectra of an aqueous solution of tetracycline (0.2 mmol/L), an aqueous solution of tetracycline (0.2 mmol/L) and Cu(II) (0.05 mmol/L), an aqueous suspension of tetracycline (0.2 mmol/L) and nano-NiO (0.5 g/L), and an aqueous suspension of tetracycline (0.2 mmol/L), Cu(II) (0.05 mmol/L) and nano-NiO (0.5 g/L) (spectra were obtained under neutral initial pH; solutions/suspensions were pre-equilibrated for 24 h before UV measurement).

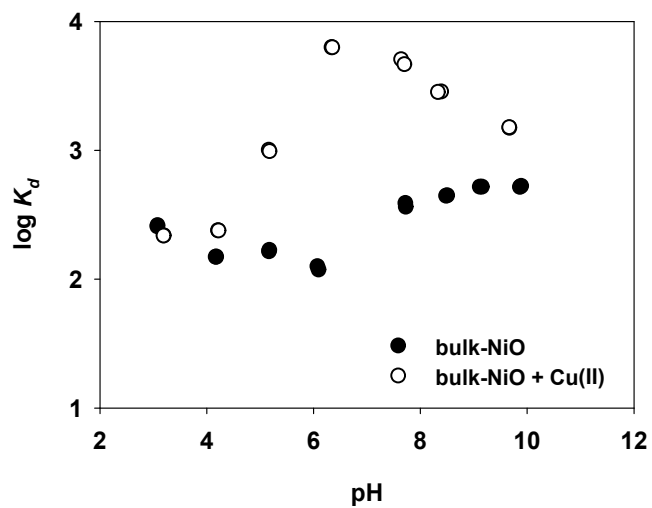

**Fig. S9.** Adsorption affinity of tetracycline to bulk-NiO (indicated by the distribution coefficient,  $K_d$ ) as a function of pH (at adsorption equilibrium) in the absence and presence of Cu(II) (initially at 0.1 mM). The initial concentration of tetracycline is 0.1 mM..

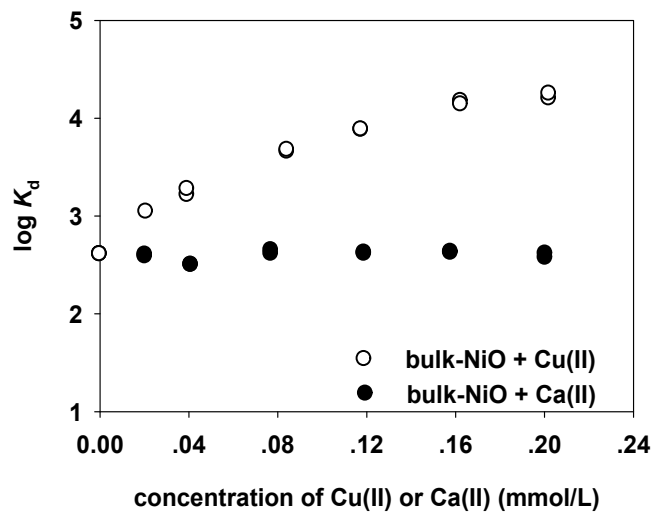

**Fig. S10.** Effects of Cu(II) and Ca(II) on the distribution coefficient ( $K_d$ ) of tetracycline to bulk-NiO under neutral pH. The x-axis shows the initial concentrations of Cu(II) or Ca(II).
